# Supplementary material for: Testing an Online, Theory-Based Intervention to Reduce Pre-drinking Alcohol Consumption and Alcohol-Related Harm in Undergraduates: a Randomized Controlled Trial
Source: Springer Nature journal article supplement (doi:10.1007/s12529-018-9736-x), 2018-07-12
Supplement: MOESM3 [file 15949040]

Table 1.

*Post-hoc Power Analyses for Achieved Power to Test Intervention Effects*

| Effects | Complete Case | | |  | LOCF | | |
| --- | --- | --- | --- | --- | --- | --- | --- |
| PDACa,b | ηp2 |  | *β* |  | ηp2 |  | *β* |
| AS x Time | < .01 |  | .05 |  | < .01 |  | .06 |
| II x Time | < .01 |  | .05 |  | < .01 |  | .11 |
| Time | .17 |  | 1.00 |  | .12 |  | 1.00 |
| AS x II x Time | .02 |  | .31 |  | < .01 |  | .29 |
| B-YAACQa,c |  |  |  |  |  |  |  |
| AS x Time | < .01 |  | .07 |  | < .01 |  | .06 |
| II x Time | < .01 |  | .07 |  | < .01 |  | .09 |
| Time | .43 |  | 1.00 |  | .28 |  | 1.00 |
| AS x II x Time | < .01 |  | .10 |  | < .01 |  | .25 |

*Note*. *β* = observed power (SPSS). LOCF = last observation carried forward; AS = autonomy support; II = implementation intention; PDAC = pre-drinking alcohol consumption; B-YAACQ = brief young adult alcohol consumption questionnaire (i.e., alcohol-related harm). aComplete Case *n* = 117; bLOCF: *n* = 201; cLOCF: *n* = 202.
